# Supplementary material
Source: PubMed Central journal article supplement (PMC6120582)
Supplement: NIHMS982994-supplement-Supplement.pdf [file NIHMS982994-supplement-Supplement.pdf]

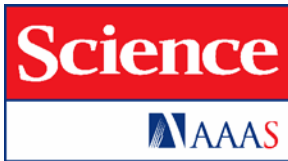

Supplementary Materials for  
**Structure of the nucleotide exchange factor eIF2B reveals mechanism of  
memory-enhancing molecule**

Jordan C. Tsai, Lakshmi E. Miller-Vedam, Aditya A. Anand, Priyadarshini Jaishankar,  
Henry C. Nguyen, Adam R. Renslo, Adam Frost,\* Peter Walter\*

\*Corresponding author. Email: peter@walterlab.ucsf.edu (P.W.); adam.frost@ucsf.edu (A.F.)

Published 30 March 2018, *Science* **359**, eaaq0939 (2018)  
DOI: 10.1126/science.aaq0939

**This PDF file includes:**

Supplementary Methods

Figs. S1 to S9

Tables S1 to S3

References

## Additional Materials and Methods

### ISRIB-A19(*R,R*) and (*S,S*) synthesis & validation

(2*S*)-2-(4-chlorophenoxy)propanoic acid was purchased from Enamine. Reagents and solvents were purchased from Sigma- Aldrich, Acros or TCI America and used as received unless otherwise indicated. Flash column chromatography was carried out using a Biotage Isolera Four system and SiliaSep silica gel cartridges from Silicycle. <sup>1</sup>H NMR spectra were recorded on a Varian INOVA-400 400MHz spectrometer. Chemical shifts are reported in  $\delta$  units (ppm) relative to residual NMR solvent peaks. Coupling constants (*J*) are reported in hertz (Hz). Characterization data are reported as follows: chemical shift, multiplicity (s=singlet, d=doublet, t=triplet, q=quartet, br=broad, m=multiplet), coupling constants, number of protons, mass to charge ratio. LC/MS analyses were performed on a Waters Micromass ZQ/Waters 2795 Separation Module/Waters 2996 Photodiode Array Detector/Waters 2424 Evaporative Light Scattering Detector system. Separations were carried out on XTerra® MS C<sub>18</sub> 5 $\mu$ m 4.6x50mm column at ambient temperature using a mobile phase of water-methanol containing 0.1% formic acid.

### Synthesis of (2*S*)-2-(4-Chlorophenoxy)-*N*-[(1*r*,4*r*)-4-[(2*S*)-2-(4-chlorophenoxy)propanamido]cyclohexyl]propanamide (ISRIB-A19(*S,S*)):

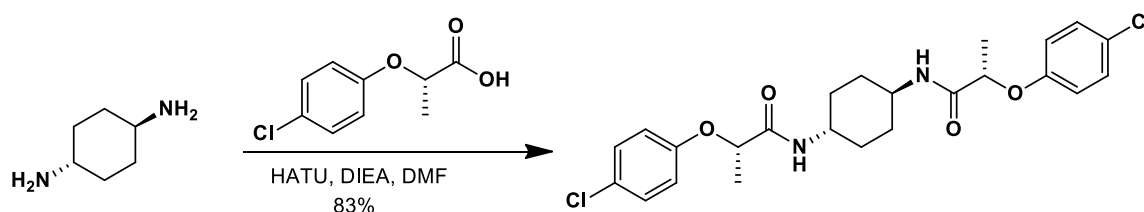

To a solution of the (2*S*)-2-(4-chlorophenoxy)propanoic acid (0.176 g, 0.88 mmol) in *N,N*-dimethylformamide (4 ml), was added HATU (0.35 g, 0.88 mmol), *trans*-1,4-diaminocyclohexane (0.05 g, 0.44 mmol), and *N,N*-diisopropylethylamine (0.3 ml, 1.76 mmol). The mixture was stirred at ambient temperature until the reaction was judged complete by LC/MS. The reaction mixture was then filtered and the collected material washed with diethyl ether, water, and then dried to obtain 175 mg (83%) of the title compound as a white solid. <sup>1</sup>H NMR (400 MHz, *d*<sub>6</sub>-DMSO)  $\delta$  7.96 (d, *J* = 8 Hz, 2H), 7.30-7.34 (m, 4H), 6.89-6.93 (m, 4H), 4.63 (q, *J* = 6.6 Hz, 2H), 3.48 (br.s, 2H), 1.73 (d, *J* = 7.3 Hz, 2H), 1.64 (d, *J* = 7.3 Hz, 2H), 1.40(d, *J* = 6.6 Hz, 6H), 1.23-1.33 (m, 4H); <sup>13</sup>C NMR (100 MHz, CDCl<sub>3</sub>)  $\delta$  170.40, 156.85, 129.65, 125.17, 117.41, 74.31, 47.33, 31.16, 19.10; LCMS *m/z* 479 (MH<sup>+</sup>).

### Synthesis of ethyl (2R)-2-(4-chlorophenoxy)propanoate:

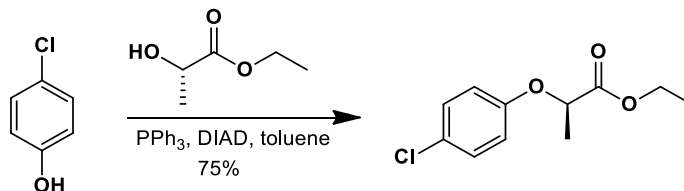

To a cooled (-20°C) solution of ethyl (2S)-2-hydroxypropanoate (0.330 g, 2.8 mmol), 4-chlorophenol (0.359 g, 2.8 mmol) and triphenylphosphine (0.733 g, 2.8 mmol, 1.0 equiv.) in toluene was added diisopropyl azodicarboxylate (0.550 ml, 2.8 mmol). The mixture was stirred at -20°C for an hour and then at ambient temperature for 24 hours. The reaction mixture was concentrated *in vacuo* to remove the toluene solvent. To the resulting residue was added hexanes and the precipitate that formed was filtered off. The filtrate was concentrated *in vacuo* and purified by flash column chromatography (25 g, 0-10% EA/hex) to obtain 0.48 g (75%) of the product as a yellow oil. <sup>1</sup>H NMR (400 MHz, CDCl<sub>3</sub>) δ 7.21-7.26 (m, 2H), 6.80-6.84 (m, 2H), 4.71 (q, *J* = 6.8 Hz, 1H), 4.20-4.25 (m, 2H), 1.62 (d, *J* = 6.8 Hz, 3H), 1.26 (t, *J* = 7.2 Hz, 3H); LCMS *m/z* 228 (MH<sup>+</sup>).

### Synthesis of (2R)-2-(4-Chlorophenoxy)-N-[(1r,4r)-4-[(2R)-2-(4-chlorophenoxy)propanamido]cyclohexyl]propanamide (ISRIB-A19(R,R)):

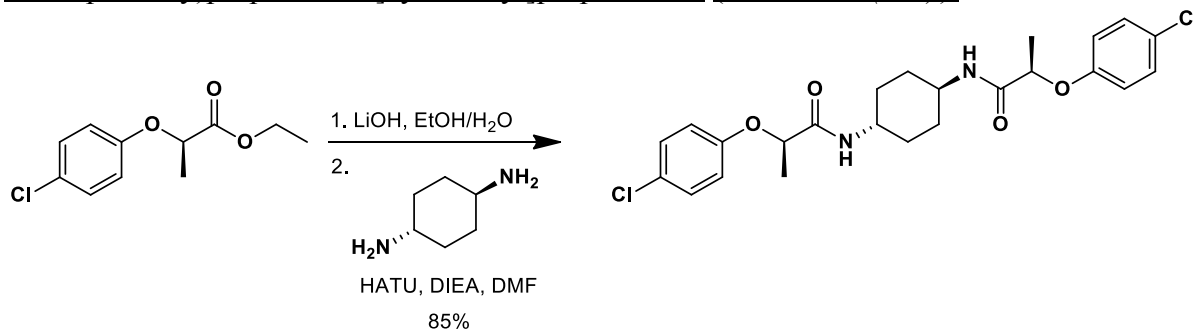

To a solution of ethyl (2R)-2-(4-chlorophenoxy)propanoate (0.150 g, 0.7 mmol) in 2:1 mixture of ethanol-water (6 ml) was added 1 M aqueous lithium hydroxide solution (1.312 ml, 1.3 mmol). The mixture was stirred at ambient temperature for 24 h. The reaction mixture was concentrated *in vacuo* to remove ethanol, diluted with water and adjusted to pH 2 with 1 N aqueous hydrochloric acid solution. The mixture was extracted with ethyl acetate. The organic extracts were washed with brine, dried over magnesium sulfate and concentrated to obtain 123 mg of (2R)-2-(4-chlorophenoxy)propanoic acid as a white solid. This material was used directly in the next reaction.

To a solution of the (2R)-2-(4-chlorophenoxy)propanoic acid (0.1 g, 0.5 mmol) in *N,N*-dimethylformamide (2 ml), was added HATU (0.2 g, 0.525 mmol), *trans*-1,4-diaminocyclohexane (0.028 g, 0.25 mmol), and *N,N*-diisopropylethylamine (0.174 ml, 1.0 mmol). The mixture was stirred at ambient temperature until the reaction was judged complete by LC/MS. The reaction mixture was filtered and the collected material was washed with diethyl ether, water, and then dried to obtain 100 mg (85%) of the title compound as a white solid. <sup>1</sup>H NMR (400 MHz, *d*<sub>6</sub>-DMSO) δ 7.96 (d, *J* = 8.3 Hz, 2H),

7.30-7.34 (m, 4H), 6.88-6.92 (m, 4H), 4.63 (q,  $J = 6.5$  Hz, 2H), 3.49 (br.s, 2H), 1.73 (d,  $J = 8.3$  Hz, 2H), 1.64 (d,  $J = 7.3$  Hz, 2H), 1.44 (d,  $J = 6.6$  Hz, 6H), 1.22-1.30 (m, 4H); LCMS  $m/z$  479 (MH<sup>+</sup>).

Confirmation of inversion of configuration in preparation of intermediates for ISRIB-A19(*R,R*) synthesis.

To confirm inversion of stereochemical configuration during the preparation of ethyl (*2R*)-2-(4-chlorophenoxy)propanoate, the (*2S*)-2-(4-chlorophenoxy)propanoic acid and (*2R*)-2-(4-chlorophenoxy)propanoic acid used in the preparation of ISRIB-A19(*S,S*) and ISRIB-A19(*R,R*), respectively, were coupled to (*R*)-(+)-alpha-methylbenzylamine as detailed below. The resulting amides were found to be single and distinct diastereoisomers, confirming the enantiomeric relationship of the propanoic acids and accordingly of ISRIB-A19(*R,R*) and ISRIB-A19(*R,R*).

Synthesis of (*2S*)-2-(4-chlorophenoxy)-*N*-[(*1R*)-1-phenylethyl]propanamide:

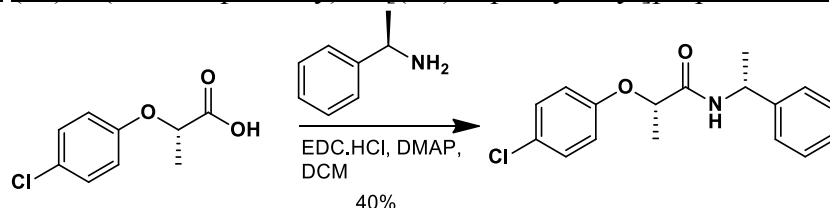

To a solution of (*2S*)-2-(4-chlorophenoxy)propanoic acid (0.050 g, 0.2 mmol) in CH<sub>2</sub>Cl<sub>2</sub> (3 ml) was added 1-(3-dimethylaminopropyl)-3-ethylcarbodiimide hydrochloride (0.048 g, 0.3 mmol), 4-dimethylaminopyridine (0.003 g, 0.025 mmol), and finally (*R*)-(+)-alpha-methylbenzylamine (0.032 ml, 0.2 mmol). The mixture was stirred at ambient temperature for 24 h. The reaction mixture was then washed with saturated aqueous ammonium chloride, water and brine. The organic layer was separated, dried over magnesium sulfate, filtered and concentrated. The crude product was purified by flash column chromatography (0-50% EtOAc/hexanes) to yield 30 mg (40%) of the title compound as a white solid. <sup>1</sup>H NMR (400 MHz, CDCl<sub>3</sub>) δ 7.36-7.40 (m, 2H), 7.27-7.32 (m, 5H), 6.86-6.90 (m, 2H), 6.59 (d,  $J = 7.8$  Hz, 1H), 5.15-5.20 (m, 1H), 4.66 (q,  $J = 6.8$  Hz, 1H), 1.56 (d,  $J = 6.6$  Hz, 3H), 1.43 (d,  $J = 6.8$  Hz, 3H); <sup>13</sup>C NMR (100 MHz, CDCl<sub>3</sub>) δ 170.84, 155.49, 142.68, 129.79, 127.53, 127.12, 126.05, 116.87, 75.59, 48.27, 21.63, 18.68; LCMS  $m/z$  304 (MH<sup>+</sup>).

Synthesis of (2R)-2-(4-chlorophenoxy)-N-[(1R)-1-phenylethyl]propanamide:

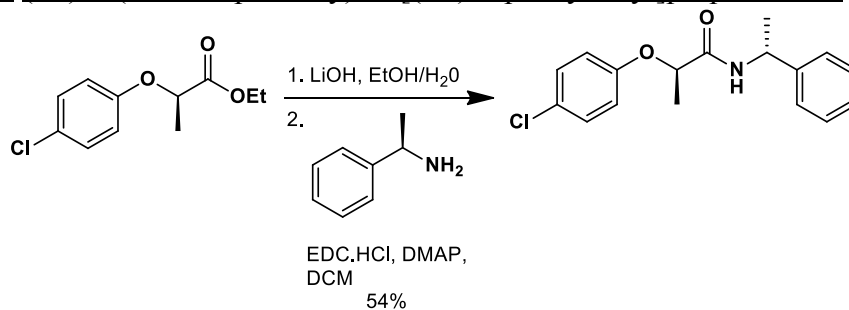

To a solution of ethyl (2R)-2-(4-chlorophenoxy)propanoate (0.1 g, 0.44 mmol) in a 2:1 mixture of ethanol-water (6 ml) was added 1 M aqueous lithium hydroxide solution (0.88 ml, 0.88 mmol). The mixture was stirred at ambient temperature for 18 h. The reaction mixture was concentrated *in vacuo* to remove ethanol, diluted with water and adjusted to pH 2 with 1N aqueous hydrochloric acid solution. The mixture was extracted with ethyl acetate. The organic extracts were washed with brine, dried over magnesium sulfate and concentrated to obtain 85 mg of (2R)-2-(4-chlorophenoxy)propanoic acid as a white solid. This material was used directly in the next step.

To a solution of the (2R)-2-(4-chlorophenoxy)propanoic acid (0.085 g, 0.42 mmol) in CH<sub>2</sub>Cl<sub>2</sub> (5 ml) was added 1-(3-dimethylaminopropyl)-3-ethylcarbodiimide hydrochloride (0.082 g, 0.43 mmol), 4-dimethylaminopyridine (0.005 g, 0.042 mmol), and finally (R)-(+)-alpha-methylbenzylamine (0.054 ml, 0.42 mmol). The mixture was stirred at ambient temperature for 24 hours. The reaction mixture was then washed with saturated aqueous ammonium chloride, water and brine. The organic layer was separated, dried over magnesium sulfate, filtered and concentrated. The crude product was purified by flash column chromatography (0-50% EtOAc/hexanes) to yield 70 mg (54%) of the title compound as a white solid. <sup>1</sup>H NMR (400 MHz, CDCl<sub>3</sub>) δ 7.21-7.26 (m, 5H), 7.09-7.11 (m, 2H), 6.79-6.83 (m, 2H), 6.56-6.58 (m, 1H), 5.10-5.18 (m, 1H), 4.63 (q, *J* = 6.7 Hz, 1H), 1.61 (d, *J* = 6.6 Hz, 3H), 1.52 (d, *J* = 7.1 Hz, 3H); <sup>13</sup>C NMR (100 MHz, CDCl<sub>3</sub>) δ 170.96, 155.46, 142.67, 129.67, 128.58, 127.36, 127.08, 125.91, 116.89, 75.50, 48.30, 21.80, 18.77; LCMS *m/z* 304 (MH<sup>+</sup>).

10/12/2017 12:32:42 PM  
 (2S)-2-(4-Chlorophenoxy)-N-[(1r,4r)-4-[(2S)-2-(4-chlorophenoxy)propanamido]cyclohexyl]propanamide (1014817)

| Acquisition Time (sec) | Comment              | Z118098_0411 (PA BBO 400S1 BBF-H-D-05 Z SP) | Date                                                             |
|------------------------|----------------------|---------------------------------------------|------------------------------------------------------------------|
| 4.1099                 |                      |                                             | 15 Feb 2017 14:24:00                                             |
| Date Stamp             | 15 Feb 2017 14:24:00 | File Name                                   | C:\Users\priya\Desktop\NMR\Spectral\NMR#149\149FTD\9\149-10.11fd |
| Frequency (MHz)        | 399.54               | Nucleus                                     | <sup>1</sup> H                                                   |
| Original Points Count  | 32788                | Owner                                       | SMDC_A                                                           |
| Receiver Gain          | 166.07               | SW (cycles) (Hz)                            | 7979.72                                                          |
| Spectrum Type          | STANDARD             | Sweep Width (Hz)                            | 7979.48                                                          |
|                        |                      | Temperature (degree C)                      | 24.995                                                           |
|                        |                      | Number of Transients                        | 16                                                               |
|                        |                      | Points Count                                | 32788                                                            |
|                        |                      | Pulse Sequence                              | zg30                                                             |
|                        |                      | Solvent                                     | DMSO-d6                                                          |
|                        |                      | Spectrum Offset (Hz)                        | 2467.1382                                                        |

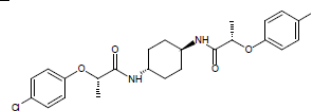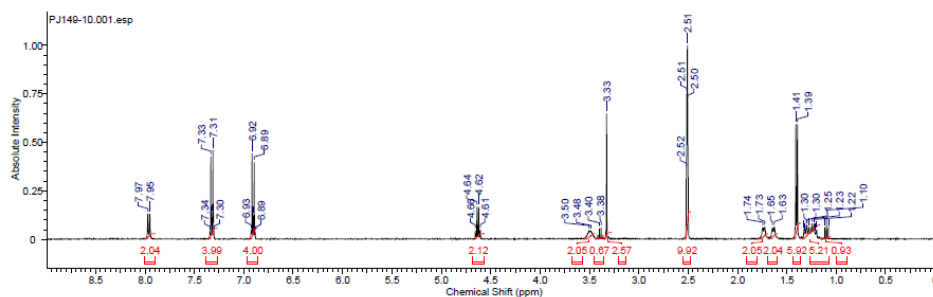

10/12/2017 12:35:49 PM  
 (2S)-2-(4-Chlorophenoxy)-N-[(1r,4r)-4-[(2S)-2-(4-chlorophenoxy)propanamido]cyclohexyl]propanamide (1014817)

| Acquisition Time (sec) | Comment              | Z118098_0411 (PA BBO 400S1 BBF-H-D-05 Z SP) | Date                                                                  |
|------------------------|----------------------|---------------------------------------------|-----------------------------------------------------------------------|
| 1.3631                 |                      |                                             | 12 Oct 2017 09:42:40                                                  |
| Date Stamp             | 12 Oct 2017 09:42:40 | File Name                                   | C:\Users\priya\Desktop\NMR\Spectral\NMR#149\149FTD\9\PJ149-10C13\11fd |
| Frequency (MHz)        | 100.46               | Nucleus                                     | <sup>13</sup> C                                                       |
| Original Points Count  | 32788                | Owner                                       | SMDC_A                                                                |
| Receiver Gain          | 208.51               | SW (cycles) (Hz)                            | 24038.46                                                              |
| Spectrum Type          | STANDARD             | Sweep Width (Hz)                            | 24037.73                                                              |
|                        |                      | Temperature (degree C)                      | 24.995                                                                |
|                        |                      | Number of Transients                        | 167                                                                   |
|                        |                      | Points Count                                | 32788                                                                 |
|                        |                      | Pulse Sequence                              | zgpg30                                                                |
|                        |                      | Solvent                                     | DMSO-d6                                                               |
|                        |                      | Spectrum Offset (Hz)                        | 10048.3408                                                            |

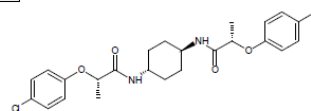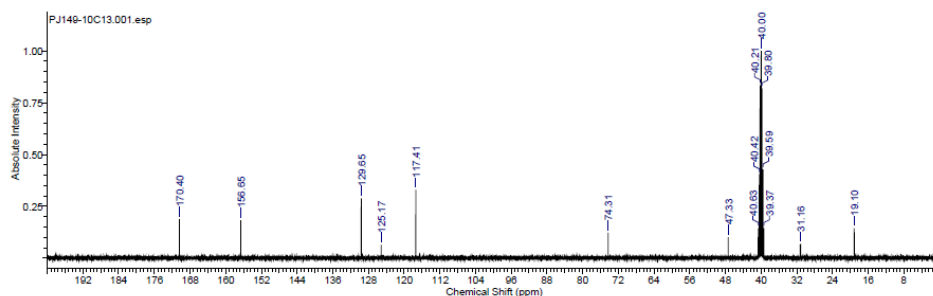

10/12/2017 12:38:37 PM

(2R)-2-(4-Chlorophenoxy)-N-[(1r,4r)-4-[(2R)-2-(4-chlorophenoxy)propanamido]cyclohexyl]propanamide (1014869)

| Acquisition Time (sec) | Comment              | Z116098_0411 (PA BBO 400S1 BBF-H-D-05 Z SP) | Date                                                               | 15 Mar 2017 09:23:28   |         |                      |           |
|------------------------|----------------------|---------------------------------------------|--------------------------------------------------------------------|------------------------|---------|----------------------|-----------|
| Date Stamp             | 15 Mar 2017 09:23:28 | File Name                                   | C:\Users\priya\Desktop\NMR\Spectra\NMR#149\149FTD\9\PU149-27\1.fid |                        |         |                      |           |
| Frequency (MHz)        | 399.54               | Nucleus                                     | 1H                                                                 | Number of Transients   | 16      | Origin               | spect     |
| Original Points Count  | 32768                | Owner                                       | SMDC A                                                             | Points Count           | 32768   | Pulse Sequence       | zg30      |
| Receiver Gain          | 185.41               | SW(cyclical) (Hz)                           | 7978.72                                                            | Solvent                | DMSO-d6 | Spectrum Offset (Hz) | 2467.1362 |
| Spectrum Type          | STANDARD             | Sweep Width (Hz)                            | 7978.48                                                            | Temperature (degree C) | 25.002  |                      |           |

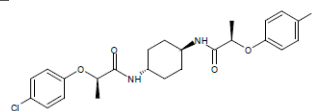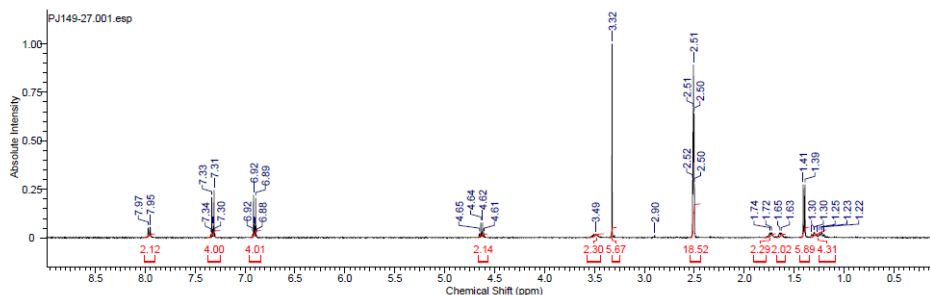

10/10/2017 11:16:06 AM

(2S)-2-(4-chlorophenoxy)-N-[(1R)-1-phenylethyl]propanamide

| Acquisition Time (sec) | Comment              | Z116098_0411 (PA BBO 400S1 BBF-H-D-05 Z SP) | Date                                                                | 25 Sep 2017 10:12:32   |              |                      |           |
|------------------------|----------------------|---------------------------------------------|---------------------------------------------------------------------|------------------------|--------------|----------------------|-----------|
| Date Stamp             | 25 Sep 2017 10:12:32 | File Name                                   | C:\Users\priya\Desktop\NMR\Spectra\NMR#149\149FTD\9\PU149-127\1.fid |                        |              |                      |           |
| Frequency (MHz)        | 399.54               | Nucleus                                     | 1H                                                                  | Number of Transients   | 16           | Origin               | spect     |
| Original Points Count  | 32768                | Owner                                       | SMDC A                                                              | Points Count           | 32768        | Pulse Sequence       | zg30      |
| Receiver Gain          | 74.50                | SW(cyclical) (Hz)                           | 7978.72                                                             | Solvent                | CHLOROFORM-d | Spectrum Offset (Hz) | 2467.1362 |
| Spectrum Type          | STANDARD             | Sweep Width (Hz)                            | 7978.48                                                             | Temperature (degree C) | 25.002       |                      |           |

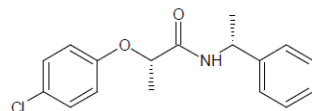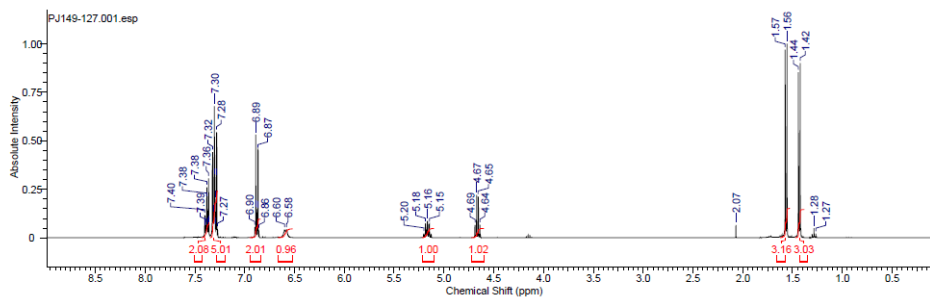

10/12/2017 11:22:58 AM  
 (2S)-2-(4-chlorophenoxy)-N-[(1R)-1-phenylethyl]propanamide

|                        |                      |                    |                                                                        |                        |                      |
|------------------------|----------------------|--------------------|------------------------------------------------------------------------|------------------------|----------------------|
| Acquisition Time (sec) | 1.3631               | Comment            | Z116098_0411 (PA BBO 400S1 BBF-H-D-05 Z SP)                            | Date                   | 25 Sep 2017 10:16:48 |
| Date Stamp             | 25 Sep 2017 10:16:48 | File Name          | C:\Users\priya\Desktop\NMR\Spectra\NMR#149\149FTD's\PJ149-127C1311.fid | Origin                 | spect                |
| Frequency (MHz)        | 100.46               | Nucleus            | <sup>13</sup> C                                                        | Number of Transients   | 130                  |
| Original Points Count  | 32768                | Owner              | SMDC A                                                                 | Points Count           | 32768                |
| Receiver Gain          | 208.51               | SW (cyclical) (Hz) | 24038.46                                                               | Solvent                | CHLOROFORM-d         |
| Spectrum Offset (Hz)   | 10048.3408           | Spectrum Type      | STANDARD                                                               | Sweep Width (Hz)       | 24037.73             |
|                        |                      |                    |                                                                        | Temperature (degree C) | 25.008               |

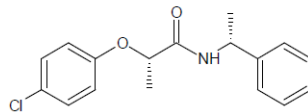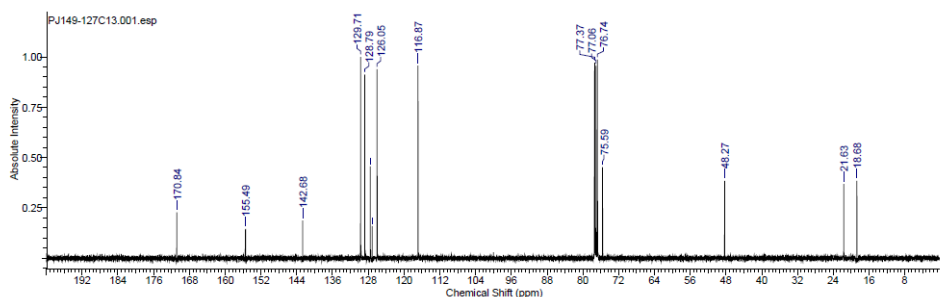

10/12/2017 11:29:54 AM  
 (2R)-2-(4-chlorophenoxy)-N-[(1R)-1-phenylethyl]propanamide

|                        |                      |                    |                                                                      |                        |                      |
|------------------------|----------------------|--------------------|----------------------------------------------------------------------|------------------------|----------------------|
| Acquisition Time (sec) | 4.1099               | Comment            | Z116098_0411 (PA BBO 400S1 BBF-H-D-05 Z SP)                          | Date                   | 27 Sep 2017 13:03:12 |
| Date Stamp             | 27 Sep 2017 13:03:12 | File Name          | C:\Users\priya\Desktop\NMR\Spectra\NMR#149\149FTD's\PJ149-129\11.fid | Origin                 | spect                |
| Frequency (MHz)        | 399.54               | Nucleus            | <sup>1</sup> H                                                       | Number of Transients   | 16                   |
| Original Points Count  | 32768                | Owner              | SMDC A                                                               | Points Count           | 32768                |
| Receiver Gain          | 93.24                | SW (cyclical) (Hz) | 7978.72                                                              | Solvent                | CHLOROFORM-d         |
| Spectrum Offset (Hz)   | 2467.1362            | Spectrum Type      | STANDARD                                                             | Sweep Width (Hz)       | 7978.48              |
|                        |                      |                    |                                                                      | Temperature (degree C) | 24.999               |

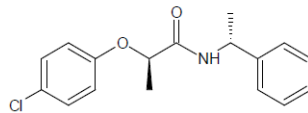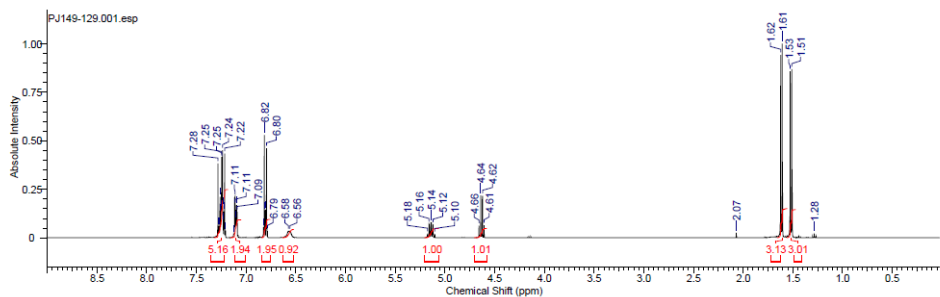



10/12/2017 12:26:50 PM  
(2R)-2-(4-chlorophenoxy)-N-((1R)-1-phenylethyl)propanamide

|                        |                      |                    |                                                                      |                        |                      |
|------------------------|----------------------|--------------------|----------------------------------------------------------------------|------------------------|----------------------|
| Acquisition Time (sec) | 1.3631               | Comment            | Z116098_0411 (PA BBO 400S1 BBF-H-D-05 Z SP)                          | Date                   | 27 Sep 2017 13:13:52 |
| Date Stamp             | 27 Sep 2017 13:13:52 | File Name          | C:\Users\pryal\Desktop\NMR\Spectra\NMR#149\149FTD\pJ149-129C13\2.fid | Number of Transients   | 131                  |
| Frequency (MHz)        | 100.46               | Nucleus            | <sup>13</sup> C                                                      | Points Count           | 32768                |
| Original Points Count  | 32768                | Owner              | SMDC_A                                                               | Pulse Sequence         | zgpg30               |
| Receiver Gain          | 208.51               | SW (cyclical) (Hz) | 24038.46                                                             | Solvent                | CHLOROFORM-d         |
| Spectrum Offset (Hz)   | 10046.3408           | Spectrum Type      | STANDARD                                                             | Sweep Width (Hz)       | 24037.73             |
|                        |                      |                    |                                                                      | Temperature (degree C) | 24.999               |

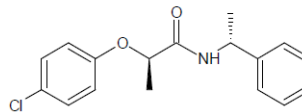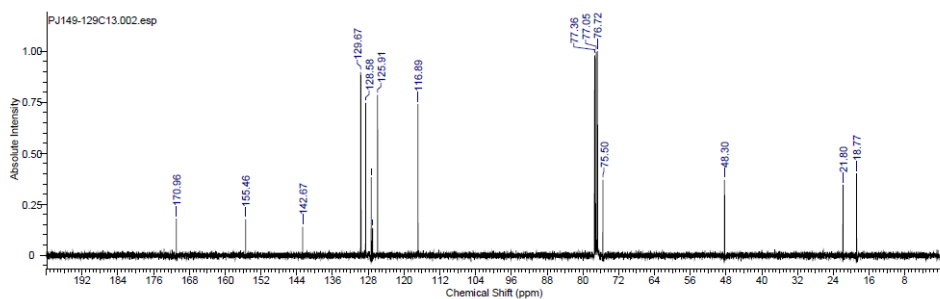

## Sequences

> heIF2B1\_alpha\_codonopt

```
ATGGACGACAAAGAAGACTGATCGAATACTTCAAATCTCAGATGAAAGAAG
ACCCGGACATGGCTTCTGCTGTTGCTGCTATCCGTACCCTGCTGGAGTTCCTG
AAACGTGACAAAGGTGAAACCATCCAGGGTCTGCGTGCTAACCTGACCTCTG
CTATCGAAACCCTGTGCGGTGTTGACTCTTCTGTTGCTGTTTCTTCTGGTGGTG
AACTGTTCCCTGCGTTTCATCTCTCTGGCTTCTCTGGAATACTCTGACTACTCTA
AATGCAAAAAAATCATGATCGAACGTGGTGAACGTTCCTGCGTCGTATCTCT
CTGTCTCGTAACAAAATCGCTGACCTGTGCCACACCTTCATCAAAGACGGTG
CTACCATCCTGACCCACGTTACTCTCGTGTTGTTCTGCGTGTTCTGGAAGCT
GCTGTTGCTGCTAAAAAACGTTTCTCTGTTTACGTTACCGAATCTCAGCCGGA
CCTGTCTGGTAAAAAATGGCTAAAGCTCTGTGCCACCTGAACGTTCCGGTTA
CCGTTGTTCTGGACGCTGCTGTTGGTTACATCATGGAAAAAGCTGACCTGGTT
ATCGTTGGTGCTGAAGGTGTTGTTGAAAACGGTGGTATCATCAACAAAATCG
GTACCAACCAGATGGCTGTTTGCCTAAAGCTCAGAACAAACCGTTCTACGT
TGTTGCTGAATCTTTCAAATTCGTTCTGTTCCCGCTGAACCAGCAGGACG
TTCCGGACAAATTCAAATACAAAGCTGACACCCTGAAAGTTGCTCAGACCGG
TCAGGACCTGAAAGAAGAACACCCGTGGGTGACTACACCGCTCCGTCTCTG
ATCACCTGCTGTTACCGACCTGGGTGTTCTGACCCCGTCTGCTGTTTCTGA
CGAACTGATCAAACGTACCTGTAA
```

>heIF2B2\_beta\_codonopt | 6x His tag, TEV site

```
ATGCATCACCATCATCACCACGGTGGTGGTTCTGAAAACCTGTA CTCTCCA
GTCTCCGGGTTCTGCTGCTAAAGGTTCTGAACTGTCTGAACGTATCGAATCTT
TCGTTGAAACCCTGAAACGTGGTGGTGGTCCGCGTTCTTCTGAAGAAATGGCT
CGTGAAACCCTGGGTCTGCTGCGTCAGATCATCACCGACCACCGTTGGTCTA
ACGCTGGTGAACGTGATGGAACGTGATCCGTCGTGAAGGTCGTCGTATGACCGC
TGCTCAGCCGTCTGAAACCACCGTTGGTAAACATGGTTTCGTCGTGTTCTGAAA
TCATCCGTGAAGAATACGGTCGTCTGCACGGTTCGTTCTGACGAATCTGACCA
GCAGGAATCTCTGCACAAACTGCTGACCTCTGGTGGTCTGAACGAAGACTTC
TCTTTCCACTACGCTCAGCTGCAGTCTAACATCATCGAAGCTATCAACGAAC
GCTGGTTGAACTGGAAGGTACGATGGAAAACATCGCTGCTCAGGCTCTGGAA
CACATCCACTCTAACGAAGTTATCATGACCATCGGTTTCTCTCGTACCGTTGA
AGCTTTCTGAAAGAAGCTGCTCGTAAACGTAAATTCACGTTATCGTTGCTG
AATGCGCTCCGTTCTGCCAGGGTCACGAAATGGCTGTTAACCTGTCTAAAGCT
GGTATCGAAACCACCGTTATGACCGACGCTGCTATCTTCGCTGTTATGTCTCG
TGTTAACAAAGTTATCATCGGTACCAAACCATCCTGGCTAACGGTGCTCTGC
GTGCTGTTACCGGTACCCACACCCTGGCTCTGGCTGCTAAACACCACTCTACC
CCGCTGATCGTTTGCCTCCGATGTTCAAACGTCTCTCCGCAGTTCCCGAACGA
AGAAGACTCTTTCCACAAATTCGTTGCTCCGGAAGAAGTTCTGCCGTTACCG
AAGGTGACATCCTGGAAAAAGTTTCTGTTCACTGCCCGGTTTTCGACTACGTT
CCGCCGGAACGTATCACCTGTTTCACTCTAACATCGGTGGTAAACGCTCCGTC
TTACATCTACCGTCTGATGTCTGAACTGTACCACCCGGACGACCACGTTCTGT
AA
```

>heIF2B3\_gamma\_codonopt

ATGGAGTTCAGGCTGTTGTTATGGCTGTTGGTGGTGGTTCCTCGTATGAC  
CGACCTGACCTCTTCTATCCCGAAACCGCTGCTGCCGGTTGGTAACAAACCGC  
TGATCTGGTACCCGCTGAACCTGCTGGAACGTGTTGGTTTCGAAGAAGTTATC  
GTTGTTACCACCCGTGACGTTACAGAAAGCTCTGTGCGCTGAGTTCAAATGA  
AAATGAAACCGGACATCGTTTGCATCCCGGACGACGCTGACATGGGTACCGC  
TGACTCTCTGCGTTACATCTACCCGAAACTGAAAACCGACGTTCTGGTTCTGT  
CTTGCGACCTGATCACCGACGTTGCTCTGCACGAAGTTGTTGACCTGTTCCGT  
GCTTACGACGCTTCTCTGGCTATGCTGATGCGTAAAGGTCAGGACTCTATCGA  
ACCGGTTCCGGGTCAGAAAGGTAAAAAAAAGCTGTTGAACAGCGTGACTTC  
ATCGGTGTTGACTCTACCGGTAAACGTCTGCTGTTTCATGGCTAACGAAGCTGA  
CCTGGACGAAGAACTGGTTATCAAAGGTTCTATCCTGCAGAAACACCCCGCT  
ATCCGTTTCCACACCGGTCTGGTTGACGCTCACCTGTACTGCCTGAAAAATA  
CATCGTTGACTTCCTGATGGAAAACGGTTCTATCACCTCTATCCGTTCTGAAC  
TGATCCCGTACCTGGTTCGTAAACAGTTCTCTTCTGCTTCTTCTCAGCAGGGTC  
AGGAAGAAAAAGAAGAAGACCTGAAAAAAAAGAACTGAAATCTCTGGACA  
TCTACTCTTTCATCAAAGAAGCTAACACCCTGAACCTGGCTCCGTACGACGCT  
TGCTGGAACGCTTGCCGTGGTGACCGTTGGGAAGACCTGTCTCGTTCTCAGGT  
TCGTTGCTACGTTACATCATGAAAGAAGGTCTGTGCTCTCGTGTTTCTACCC  
TGGGTCTGTACATGGAAGCTAACCGTCAGGTTCCGAAACTGCTGTCTGCTCTG  
TGCCCGGAAGAACCGCCGGTTCACTCTTCTGCTCAGATCGTTTCTAAACACCT  
GGTTGGTGTGACTCTCTGATCGGTCCGGAAACCCAGATCGGTGAAAAATCTT  
CTATCAAACGTTCTGTTATCGGTTCTTCTTGCCTGATCAAAGACCGTGTTACC  
ATCACCAACTGCCTGCTGATGAACTCTGTTACCGTTGAAGAAGGTTCTAACAT  
CCAGGGTTCTGTTATCTGCAACAACGCTGTTATCGAAAAAGGTGCTGACATC  
AAAGACTGCCTGATCGGTTCTGGTCAGCGTATCGAAGCTAAAGCTAAACGTG  
TTAACGAAGTTATCGTTGGTAACGACCAGCTGATGGAAATCTAA

>heIF2B4\_delta\_codonopt | isoform 2

ATGGCTGCTGTTGCTGTTGCTGTTTCGTGAAGACTCTGGTTCTGGTATGAA  
AGCTGAACTGCCGCCGGGTCCGGGTGCTGTTGGTTCGTGAAATGACCAAAGAA  
GAAAAACTGCAGCTGCGTAAAGAAAAAAAACAGCAGAAAAAAAACGTA  
GAAGAAAAAGGTGCTGAACCGGAAACCGGTTCTGCTGTTTCTGCTGCTCAGT  
GCCAGGTTGGTCCGACCCGTGAACTGCCGGAATCTGGTATCCAGCTGGGTAC  
CCCGCGTGAAAAAGTTCCGGCTGGTTCGTTCTAAAGCTGAACTGCGTGCTGAA  
CGTCGTGCTAAACAGGAAGCTGAACGTGCTCTGAAACAGGCTCGTAAAGGTG  
AACAGGGTGGTCCGCCGCCGAAAGCTTCTCCGTCTACCGCTGGTGAACCCC  
GTCTGGTGTAAACGTCTGCCGGAATACCCGCAGGTTGACGACCTGCTGCTGC  
GTCGTCTGGTTAAAAAACCGGAACGTCAGCAGGTTCCGACCCGTAAAGACTA  
CGTTTCTAAAGTTTCTCTGTTCTCTCACCTGCCGCAGTACTCTCGTCAGAACTC  
TCTGACCCAGTTCATGTCTATCCCGTCTTCTGTTATCCACCCGGCTATGGTTCG  
TCTGGGTCTGCAGTACTCTCAGGGTCTGGTTTCTGGTTCTAACGCTCGTTGCA  
TCGCTCTGCTGCGTGCTCTGCAGCAGGTTATCCAGGACTACACCACCCCGCCG  
AACGAAGAACTGTCTCGTGACCTGGTTAACAACTGAAACCGTACATGTCTT  
TCCTGACCCAGTGCCGTCCGCTGTCTGCTTCTATGCACAACGCTATCAAATTC  
CTGAACAAAGAAATCACCTCTGTTGGTTCTTCTAAACGTGAAGAAGAAGCTA

AATCTGAACTGCGTGCTGCTATCGACCGTTACGTTTCAGGAAAAAATCGTTCTG  
GCTGCTCAGGCTATCTCTCGTTTCGCTTACCAGAAAATCTCTAACGGTGACGT  
TATCCTGGTTTACGGTTGCTCTTCTCTGGTTTCTCGTATCCTGCAGGAAGCTTG  
GACCGAAGGTCGTCGTTCCGTGTTGTTGTTGTTGACTCTCGTCCGTGGCTGG  
AAGGTCGTCACACCCTGCGTTCTCTGGTTCACGCTGGTGTTCGGCTTCTTAC  
CTGCTGATCCCGGCTGCTTCTTACGTTCTGCCGGAAGTTTCTAAAGTTCTGCT  
GGGTGCTCACGCTCTGCTGGCTAACGGTTCGTGTTATGTCTCGTGTGGTACCG  
CTCAGCTGGCTCTGGTTGCTCGTGCTCACACGTTCCGGTTCGTGGTTGCTGC  
GAAACCTACAAATTCTGCGAACGTGTTTCAGACCGACGCTTTCGTTTCTAACGA  
ACTGGACGACCCGGACGACCTGCAGTGCAAACGTGGTGAACACGTTGCTCTG  
GCTAACTGGCAGAACCACGCTTCTCTGCGTCTGCTGAACCTGGTTTACGACGT  
TACCCCGCCGGAAGTGGTTGACCTGGTTATCACCGAAGTGGGTATGATCCCGT  
GCTCTTCTGTTCCGGTTGTTCTGCGTGTTAAATCTTCTGACCAGTAA

>heIF2B5\_epsilon1\_codonopt | overlap

ATGGCTGCTCCGGTTGTTGCTCCGCCGGGTGTTGTTGTTTCTCGTGCTAAC  
AAACGTTCTGGTGCTGGTCCGGGTGGTTCTGGTGGTGGTGGTGGTGGTGGTGGT  
TGAAGAAGAACC GCCGCCCGCTGCAGGCTGTTCTGGTTGCTGACTCTTTCG  
ACCGTCGTTTCTTCCCGATCTCTAAAGACCAGCCGCGTGTCTGCTGCCGCTG  
GCTAACGTTGCTCTGATCGACTACACCCTGGAGTTCCTGACCGCTACCGGTGT  
TCAGGAAACCTTCGTTTTCTGCTGCTGGAAAGCTGCTCAGATCAAAGAACAC  
CTGCTGAAATCTAAATGGTGCCGTCCGACCTCTCTGAACGTTGTTTCGTATCAT  
CACCTCTGAACTGTACCGTTCTCTGGGTGACGTTCTGCGTGACGTTGACGCTA  
AAGCTCTGGTTCGTTCTGACTTCTGCTGGTTTACGGTGACGTTATCTCTAAC  
ATCAACATCACCCGTGCTCTGGAAGAACACCGTCTGCGTCGTAACCTGGAAA  
AAAACGTTTCTGTTATGACCATGATCTTCAAAGAATCTTCTCCGTCTCACCCG  
ACCCGTTGCCACGAAGACAACGTTGTTGTTGCTGTTGACTCTACCACCAACCG  
TGTTCTGCACTTCCAGAAAACCCAGGGTCTGCGTCGTTTCGCTTTCGGCTGT  
CTCTGTTCCAGGGTCTTCTGACGGTGTGAAAGTTCGTTACGACCTGCTGGAC  
TGCCACATCTCTATCTGCTCTCCGCAGGTTGCTCAGCTGTTACCCGACAACCT  
CGACTACCAGACCCGTGACGACTTCGTTTCGTGGTCTGCTGGTTAACGAAGAA  
ATCCTGGGTAAACCAGATCCACATGCACGTTACCGCTAAAGAATACGGTGCTC  
GTGTTTCTAACCTGCACATGTAATCTGCTGTTTTCGCTGACGTTATCCGTCTG  
GGGTTTACCCGCTGACCCCGGAAGCTAACTTACCAGCTCTACCACCCAGTCT  
TGCACCCACTCTCGTCACAACATCTACCGTGGTCCGGAAGTTTCTCTGGGTCA  
CGGTTCTATCCTGGAAGAAAACGTTCTGCTGGGTCTGGTACCGTT

>heIF2B5\_epsilon2\_codonopt | overlap

CTGCTGGGTCTGGTACCGTTATCGGTTCTAACTGCTTCATCACCAACTCT  
GTTATCGGTCCGGGTGCCACATCGGTGACAACGTTGTTCTGGACCAGACCTA  
CCTGTGGCAGGGTGTTCGTGTTGCTGCTGGTGCTCAGATCCACCAGTCTCTGC  
TGTGCGACAACGCTGAAGTTAAAGAACGTGTTACCCTGAAACCCGCGTTCTGT  
TCTGACCTCTCAGGTTGTTGTTGGTCCGAACATCACCTGCCGGAAGGTTCTG  
TTATCTCTCTGCACCCGCCGGACGCTGAAGAAGACGAAGACGACGGTGAGTT  
CTCTGACGACTCTGGTGCTGACCAGGAAAAGACAAAGTTAAAATGAAAGGT  
TACAACCCGGCTGAAGTTGGTGCTGCTGGTAAAGGTTACCTGTGGAAAGCTG

CTGGTATGAACATGGAAGAAGAAGAAGAACTGCAGCAGAACCTGTGGGGTC  
TGAAAATCAACATGGAAGAAGAATCTGAATCTGAATCTGAACAGTCTATGGA  
CTCTGAAGAACCGGACTCTCGTGGTGGTTCTCCGCAGATGGACGACATCAA  
GTTTTCCAGAACGAAGTTCTGGGTACCCTGCAGCGTGGTAAAGAAGAAAACA  
TCTCTTGCGACAACCTGGTTCTGGAAATCAACTCTCTGAAATACGCTTACAAC  
GTTTCTCTGAAAGAAGTTATGCAGGTTCTGTCTCACGTTGTTCTGGAGTTCCC  
GCTGCAGCAGATGGACTCTCCGCTGGACTCTTCTCGTTACTGCGCTCTGCTGC  
TGCCGCTGCTGAAAGCTTGGTCTCCGGTTTTCCGTAACATCAAACGTGCT  
GCTGACCACCTGGAAGCTCTGGCTGCTATCGAAGACTTCTTCCTGGAACACG  
AAGCTCTGGGTATCTCTATGGCTAAAGTTCTGATGGCTTTCTACCAGCTGGAA  
ATCCTGGCTGAAGAAACCATCCTGTCTTGGTTCTCTCAGCGTGACACCACCGA  
CAAAGGTCAGCAGCTGCGTAAAAACCAGCAGCTGCAGCGTTTCATCCAGTGG  
CTGAAAGAAGCTGAAGAAGAATCTTCTGAAGACGACTAA

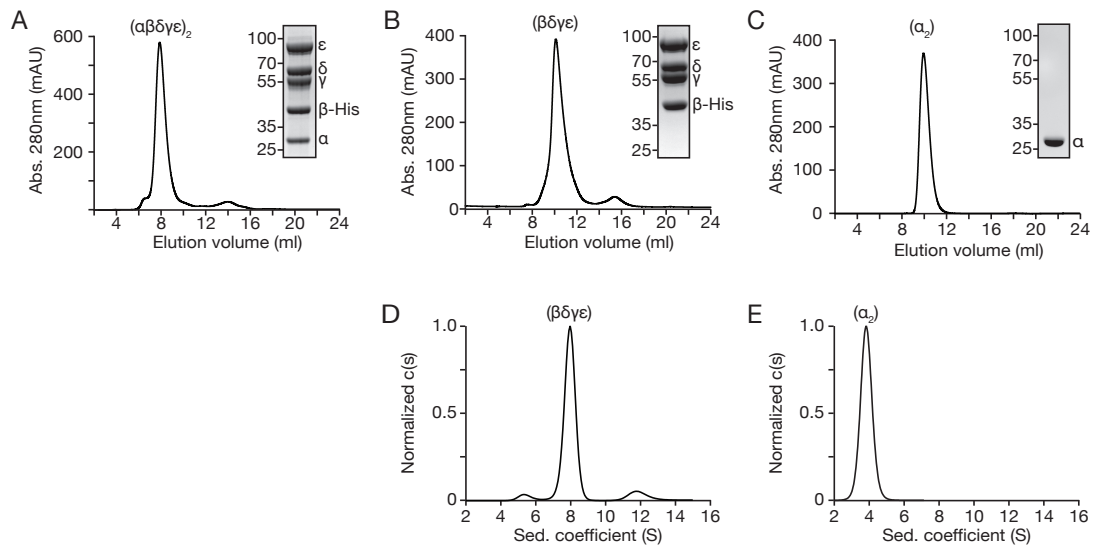

**Fig. S1**

Purification and characterization of decameric eIF2B. Characterization of (A) eIF2B( $\alpha\beta\gamma\delta\epsilon$ )<sub>2</sub>, (B) eIF2B( $\beta\gamma\delta\epsilon$ ), and (C) eIF2B( $\alpha_2$ ), by size-exclusion chromatography. Peak fractions were concentrated and characterized further by SDS-PAGE followed by Coomassie blue staining. Characterization of (D) eIF2B( $\alpha\beta\gamma\delta\epsilon$ )<sub>2</sub> and (E) eIF2B( $\alpha_2$ ) by analytical ultracentrifugation.

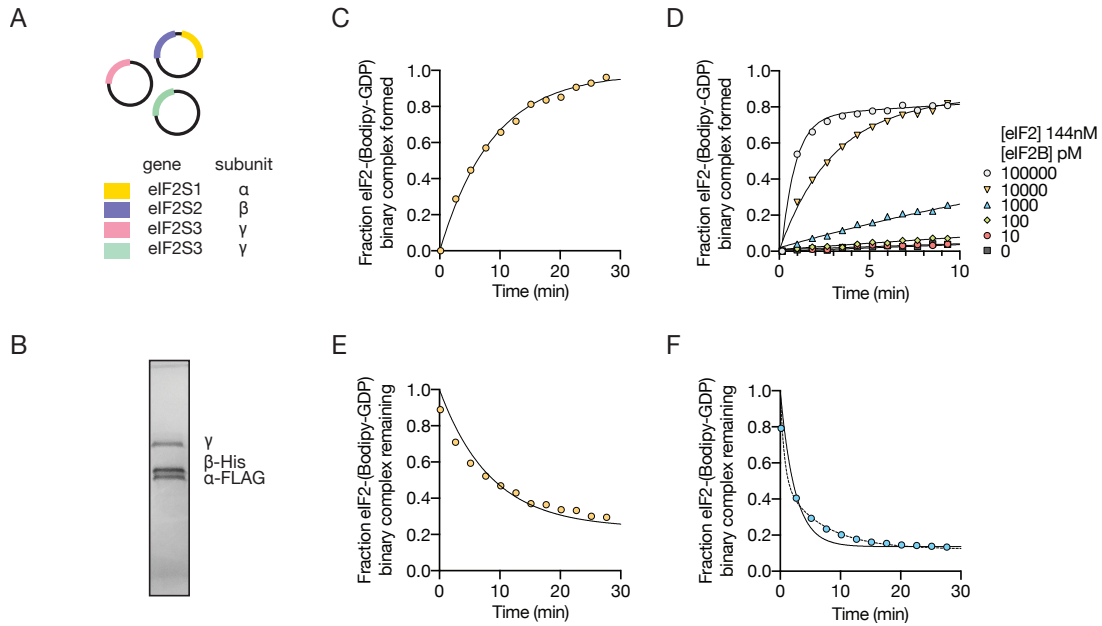

**Fig. S2**

Purification of substrate eIF2 and implementation of GDP exchange assay. (A) Recombinant *S. cerevisiae* expression system for human eIF2 as described in (30). Two copies of eIF2 $\gamma$  compensate for low expression of this gene. (B) Characterization of purified eIF2 by SDS-PAGE followed by Coomassie blue staining. (C) Fluorescent GDP loading and subsequent (D) unloading curves in the presence of 10 nM eIF2B. (E) GEF activity varies with eIF2B( $\alpha\beta\gamma\delta\epsilon$ )<sub>2</sub> concentration as measured by loading of fluorescent GDP. (F) Comparison of single-(solid line) and double-exponential (dotted line) fits of ISRIB-mediated GDP unloading. Double-exponential fits correlate better with the data ( $R^2 = 0.98$  for double, 0.88 for single) but cannot be explained by current models for nucleotide exchange.

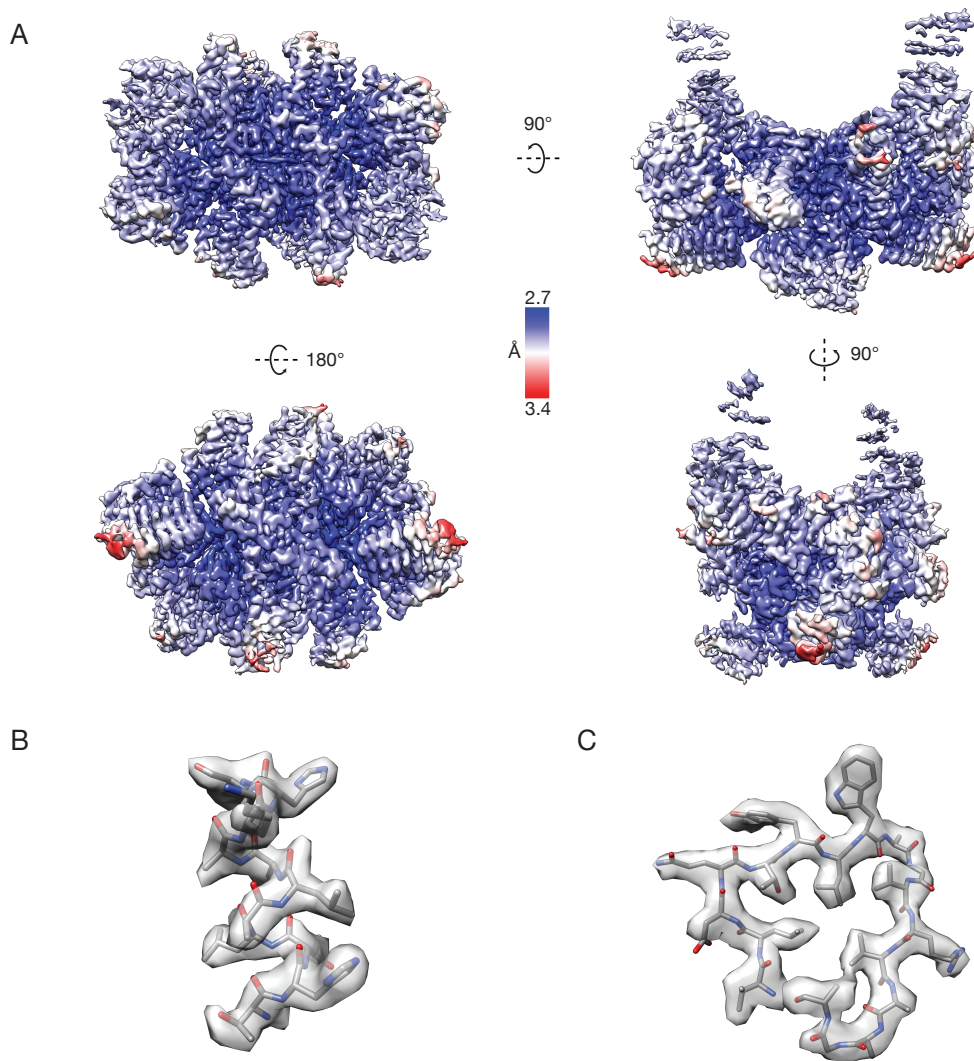

**Fig. S3**

Local resolution. (A) Local resolution estimates determined using RELION 2.1 and displayed using UCSF Chimera. Superlative regions of the cryoEM map rendered as a transparent isosurface and interpreted with atomic coordinates for an (B) alpha-helix and a turn of a (C) beta-solenoid.



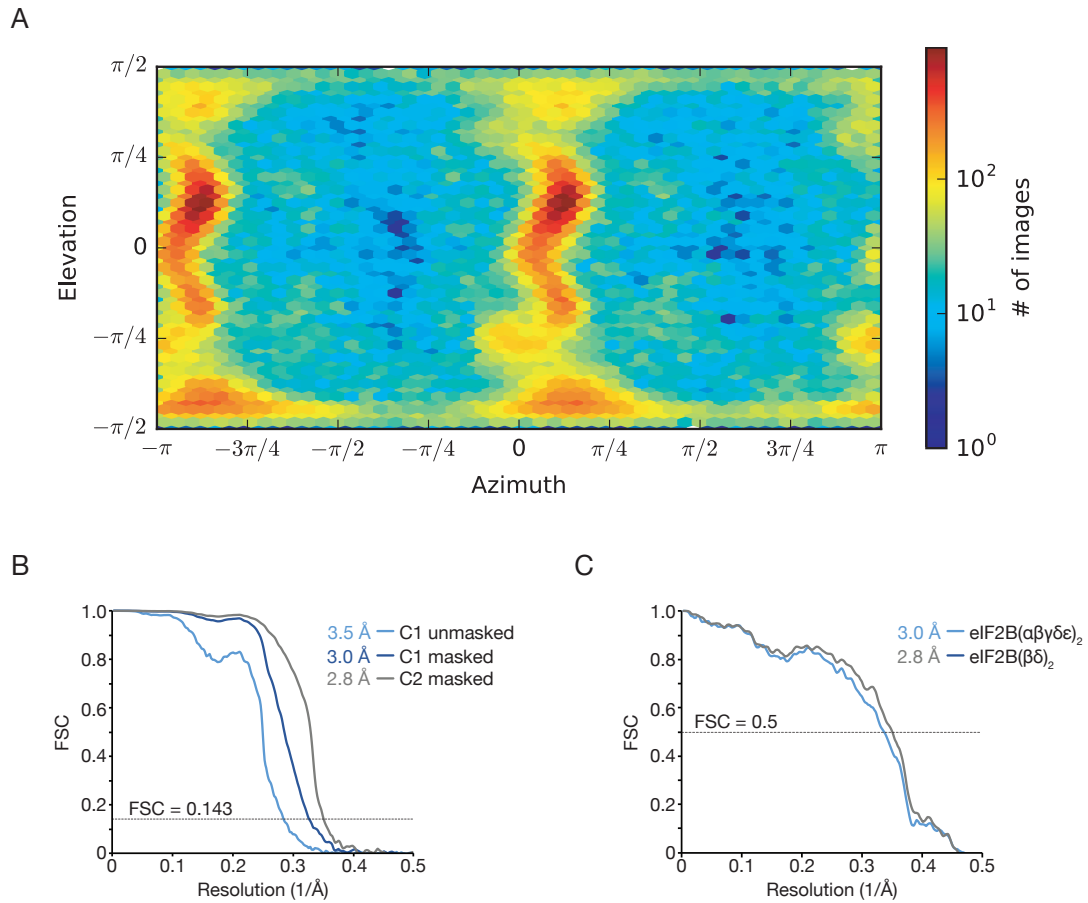

**Fig. S4**

Particle orientation distribution and resolution determination. (A) Plot of per-particle direction distribution over azimuth and elevation angles using CryoSPARC. (B) Fourier shell correlations for independent half maps reconstructed without symmetry or masking, versus without symmetry and with soft masking, and versus with C2 symmetry and soft masking. (C) Fourier shell correlations for the final cryoEM density map versus simulated density maps for the atomic model of the intact decamer versus the ISRIB-stabilized subunits alone.

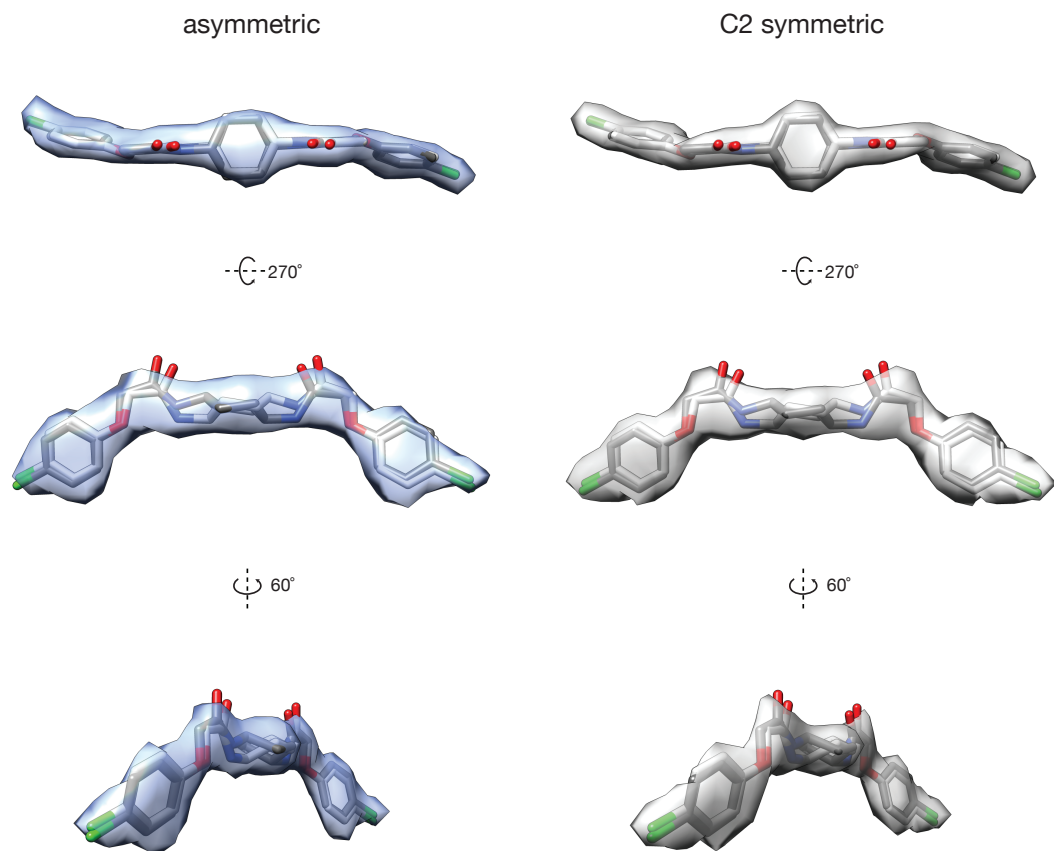

**Fig. S5**

Symmetry and multiple conformer interpretation of the ligand density. Isosurface representations of the cryoEM density computed without symmetry (left, blue) versus with C2 symmetry imposed throughout refinement (right, gray). Although additional conformers of the ligand remain possible given the density, the pair of chair conformers shown are related by rotations of  $180^\circ$  about the N–C bonds to the central cyclohexane ring, or equivalently by rotation of the entire ligand  $180^\circ$  about the axis orthogonal to the plane of the cyclohexane ring. The U-shaped conformation of the O-arylglycolamide side chains is consistent with extensive structure–activity studies of ISRIB analogs (see Fig. S6, (28, 34))

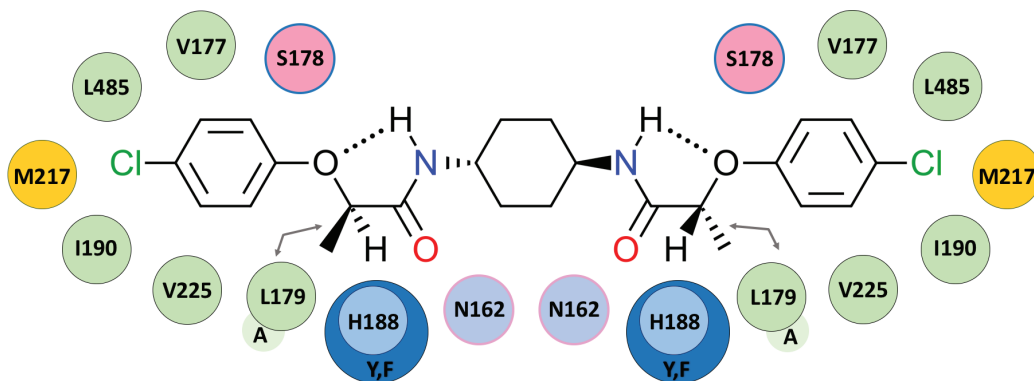

**Fig. S6**

ISRIB binding environment and key mutants. A subset of residues lining the ISRIB binding pocket are rendered as bubbles and color-coded according to amino acid properties.  $\beta$ M217 (yellow) contributes to the hydrophobicity of the pocket and an apparent sulfur-halogen interaction.  $\beta$ I190,  $\beta$ V225,  $\delta$ L485,  $\delta$ V177 and  $\delta$ L179 (green) contribute to the hydrophobicity of deep pockets in the binding site. Mutagenizing  $\delta$ L179 to Ala (smaller, lighter green circle) opened the binding pocket and enabled the methyl-substituted ISRIB-A19(*R,R*) analog to bind (arrows point to the mutated residue and the added methyl group, also see Figs. 2F and 5D).  $\beta$ N162 (blue),  $\delta$ S178 (pink), and  $\beta$ H188 (blue) coordinate polar moieties on ISRIB. Mutagenizing  $\beta$ H188 to more electron-rich aromatic residues, Tyr or Phe, (larger, darker blue circle), enhanced ISRIB binding, consistent with a stronger C-H- $\pi$  interaction in the mutants (also see Figs. 2F, Fig. 3). The proposed upside-down “U-shaped” conformation of the ligand may be stabilized by weak intramolecular hydrogen bonds shown as dashed lines.

A.

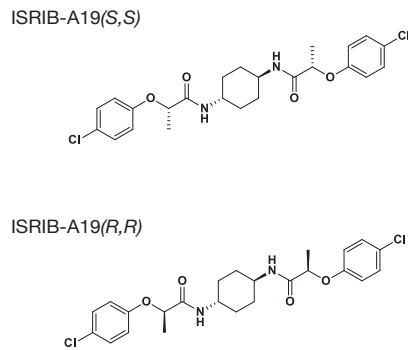

B.

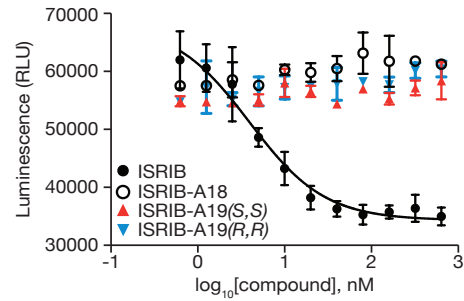

C.

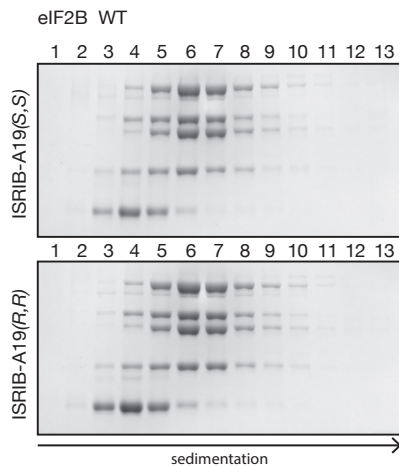

**Fig. S7**

Characterization of ISRIB-A19 enantiomers A19(*R,R*) and A19(*S,S*). (A) Chemical structure of ISRIB-A19(*R,R*) and ISRIB-A19(*S,S*). (B) Cell-based ATF4-luciferase assay with ISRIB, a previously characterized inactive analog ISRIB-A18 (28), ISRIB-A19(*R,R*), and ISRIB-A19(*S,S*) ( $n = 3$ ). ISRIB was measured to have an  $EC_{50}$  of 3.94 nM for reversal of tunicamycin induced ATF-luciferase production. (C) Stability of eIF2B( $\alpha\beta\gamma\delta\epsilon$ )<sub>2</sub> in the presence of 500 nM ISRIB-A19(*R,R*) or ISRIB-A19(*S,S*) as assessed by velocity sedimentation on sucrose gradients.

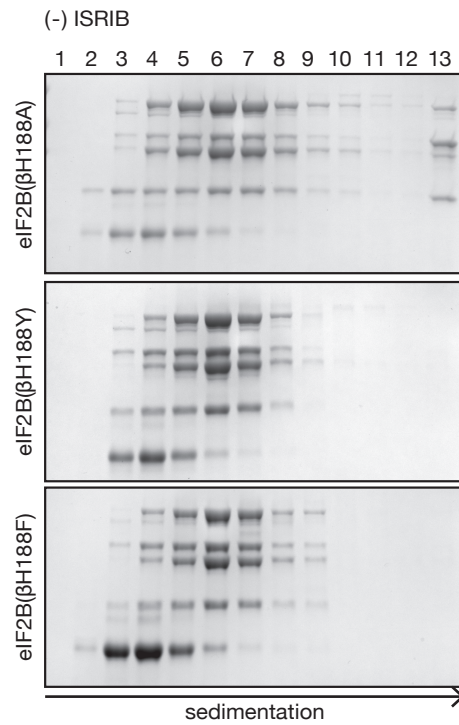

**Fig. S8**

Characterization of  $\beta$ H188 mutations by sedimentation velocity. Stability of eIF2B( $\alpha\beta\gamma\delta\epsilon$ )<sub>2</sub> in the context of  $\beta$ H188A,  $\beta$ H188Y, and  $\beta$ H188F mutations as assessed by velocity sedimentation on sucrose gradients in the absence of ISRIB.

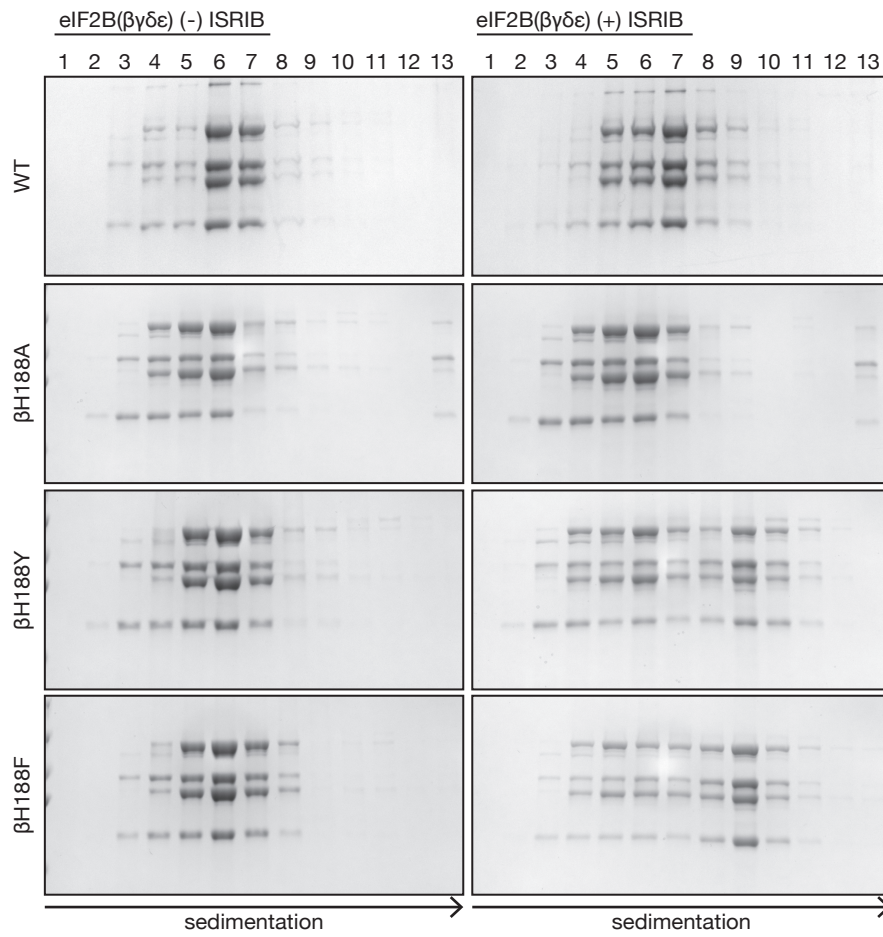

**Fig. S9**

eIF2B(βγδε) mutants enhance ISRIB-mediated dimerization. Stability of eIF2B(βγδε)<sub>2</sub> in the context of wild-type, βH188A, βH188Y, and βH188F as assessed by velocity sedimentation on sucrose gradients in the presence and absence of ISRIB.

**Table S1.**

## Data Collection Parameters

| Data Collection                                   |                                                                                  |                                                                                   |                                    |                                               |
|---------------------------------------------------|----------------------------------------------------------------------------------|-----------------------------------------------------------------------------------|------------------------------------|-----------------------------------------------|
|                                                   | eIF2B( $\alpha\beta\gamma\delta\varepsilon$ ) <sub>2</sub> +<br>ISRIB at Janelia | eIF2B( $\alpha\beta\gamma\delta\varepsilon$ ) <sub>2</sub> +<br>ISRIB at Berkeley | eIF2B( $\alpha\beta\gamma\delta$ ) | eIF2B( $\alpha\beta\gamma\delta$ ) +<br>ISRIB |
| Pixel Size ( $\text{\AA}$ )                       | 1.02                                                                             | 0.838                                                                             | 1.15                               | 1.15                                          |
| Defocus Range<br>(microns)                        | -0.3 to -3.9                                                                     | -0.3 to -3.9                                                                      | -0.7 to -5.5                       | -0.6 to -5.4                                  |
| Defocus Mean<br>(microns)                         | -2.0                                                                             | -1.8                                                                              | -1.9                               | -1.8                                          |
| Voltage (kV)                                      | 300                                                                              | 300                                                                               | 200                                | 200                                           |
| Magnification (x)                                 | 29,000                                                                           | 29,000                                                                            | 36,000                             | 36,000                                        |
| Spherical Aberration<br>(mm)                      | 2.7                                                                              | 2.62                                                                              | 2.0                                | 2.0                                           |
| Detector                                          | K2 Summit                                                                        | K2 Summit                                                                         | K2 Summit                          | K2 Summit                                     |
| Detector Pixel Size<br>(microns)                  | 5.0                                                                              | 5.0                                                                               | 5.0                                | 5.0                                           |
| Per frame electron<br>dose ( $e^-/\text{\AA}^2$ ) | 1.19                                                                             | 1.63                                                                              | 1.2                                | 1.2                                           |
| # of frames                                       | 67                                                                               | 27                                                                                | 40                                 | 40                                            |
| Frame Length<br>(seconds)                         | 0.15                                                                             | 0.18                                                                              | 0.2                                | 0.2                                           |
| Micrographs                                       | 1780                                                                             | 1515                                                                              | 129                                | 67                                            |

**Table S2.**

## Refinement Parameters

| Refinement                            |                                                                            |                                                                             |          |
|---------------------------------------|----------------------------------------------------------------------------|-----------------------------------------------------------------------------|----------|
|                                       | eIF2B( $\alpha\beta\gamma\delta\epsilon$ ) <sub>2</sub> + ISRIB at Janelia | eIF2B( $\alpha\beta\gamma\delta\epsilon$ ) <sub>2</sub> + ISRIB at Berkeley | Combined |
| Particles following 2D classification | 102599                                                                     | 99526                                                                       | 202,125  |
| FSC Average Resolution, unmasked (Å)  | 3.8                                                                        | 3.5                                                                         | 3.0      |
| FSC Average Resolution, masked (Å)    | 3.4                                                                        | 3.2                                                                         | 2.8      |
| Map Sharpening B-factor               | -75                                                                        | -75                                                                         | -78      |



**Table S3**  
Modeling

| Model Statistics                |        |
|---------------------------------|--------|
| Number of Atoms, macromolecules | 24208  |
| Number of Atoms, ligands        | 60     |
| Molprobity Score                | 1.62   |
| Clashscore, all atoms           | 5.56   |
| Favored Rotamers (%)            | 99.76  |
| Outlier Rotamers (%)            | 0.24   |
| RMS (bonds)                     | 0.0047 |
| RMS (angles)                    | 1.16   |
| Ramachandran Favored (%)        | 95.43  |
| Ramachandran Outliers (%)       | 0.00   |
| Ramachandran Allowed (%)        | 4.57   |

## References

1. R. P. Dalton, D. B. Lyons, S. Lomvardas, Co-opting the unfolded protein response to elicit olfactory receptor feedback. *Cell* **155**, 321–332 (2013). [doi:10.1016/j.cell.2013.09.033](https://doi.org/10.1016/j.cell.2013.09.033) [Medline](#)
2. M. Costa-Mattioli, D. Gobert, H. Harding, B. Herdy, M. Azzi, M. Bruno, M. Bidinosti, C. Ben Mamou, E. Marcinkiewicz, M. Yoshida, H. Imataka, A. C. Cuello, N. Seidah, W. Sossin, J.-C. Lacaille, D. Ron, K. Nader, N. Sonenberg, Translational control of hippocampal synaptic plasticity and memory by the eIF2 $\alpha$  kinase GCN2. *Nature* **436**, 1166–1173 (2005). [doi:10.1038/nature03897](https://doi.org/10.1038/nature03897) [Medline](#)
3. D. H. Munn, M. D. Sharma, B. Baban, H. P. Harding, Y. Zhang, D. Ron, A. L. Mellor, GCN2 kinase in T cells mediates proliferative arrest and anergy induction in response to indoleamine 2,3-dioxygenase. *Immunity* **22**, 633–642 (2005). [doi:10.1016/j.immuni.2005.03.013](https://doi.org/10.1016/j.immuni.2005.03.013) [Medline](#)
4. N. C. Wortham, M. Martinez, Y. Gordiyenko, C. V. Robinson, C. G. Proud, Analysis of the subunit organization of the eIF2B complex reveals new insights into its structure and regulation. *FASEB J.* **28**, 2225–2237 (2014). [doi:10.1096/fj.13-243329](https://doi.org/10.1096/fj.13-243329) [Medline](#)
5. Y. Gordiyenko, C. Schmidt, M. D. Jennings, D. Matak-Vinkovic, G. D. Pavitt, C. V. Robinson, eIF2B is a decameric guanine nucleotide exchange factor with a  $\gamma 2\epsilon 2$  tetrameric core. *Nat. Commun.* **5**, 3902 (2014). [doi:10.1038/ncomms4902](https://doi.org/10.1038/ncomms4902) [Medline](#)
6. A. M. Bogorad, B. Xia, D. G. Sandor, A. B. Mamonov, T. R. Cafarella, S. Jehle, S. Vajda, D. Kozakov, A. Marintchev, Insights into the architecture of the eIF2B $\alpha/\beta/\delta$  regulatory subcomplex. *Biochemistry* **53**, 3432–3445 (2014). [Medline](#)
7. B. Kuhle, N. K. Eulig, R. Ficner, Architecture of the eIF2B regulatory subcomplex and its implications for the regulation of guanine nucleotide exchange on eIF2. *Nucleic Acids Res.* **43**, 9994–10014 (2015). [Medline](#)
8. K. Kashiwagi, M. Takahashi, M. Nishimoto, T. B. Hiyama, T. Higo, T. Umehara, K. Sakamoto, T. Ito, S. Yokoyama, Crystal structure of eukaryotic translation initiation factor 2B. *Nature* **531**, 122–125 (2016). [doi:10.1038/nature16991](https://doi.org/10.1038/nature16991) [Medline](#)
9. E. Gomez, S. S. Mohammad, G. D. Pavitt, Characterization of the minimal catalytic domain within eIF2B: The guanine-nucleotide exchange factor for translation initiation. *EMBO J.* **21**, 5292–5301 (2002). [doi:10.1093/emboj/cdf515](https://doi.org/10.1093/emboj/cdf515) [Medline](#)
10. W. Yang, A. G. Hinnebusch, Identification of a regulatory subcomplex in the guanine nucleotide exchange factor eIF2B that mediates inhibition by phosphorylated eIF2. *Mol. Cell. Biol.* **16**, 6603–6616 (1996). [doi:10.1128/MCB.16.11.6603](https://doi.org/10.1128/MCB.16.11.6603) [Medline](#)

11. G. D. Pavitt, K. V. Ramaiah, S. R. Kimball, A. G. Hinnebusch, eIF2 independently binds two distinct eIF2B subcomplexes that catalyze and regulate guanine-nucleotide exchange. *Genes Dev.* **12**, 514–526 (1998). [doi:10.1101/gad.12.4.514](https://doi.org/10.1101/gad.12.4.514) [Medline](#)
12. T. Krishnamoorthy, G. D. Pavitt, F. Zhang, T. E. Dever, A. G. Hinnebusch, Tight binding of the phosphorylated  $\alpha$  subunit of initiation factor 2 (eIF2 $\alpha$ ) to the regulatory subunits of guanine nucleotide exchange factor eIF2B is required for inhibition of translation initiation. *Mol. Cell. Biol.* **21**, 5018–5030 (2001). [doi:10.1128/MCB.21.15.5018-5030.2001](https://doi.org/10.1128/MCB.21.15.5018-5030.2001) [Medline](#)
13. A. G. Hinnebusch, J. R. Lorsch, The mechanism of eukaryotic translation initiation: New insights and challenges. *Cold Spring Harb. Perspect. Biol.* **4**, a011544 (2012). [doi:10.1101/cshperspect.a011544](https://doi.org/10.1101/cshperspect.a011544) [Medline](#)
14. A. G. Hinnebusch, The scanning mechanism of eukaryotic translation initiation. *Annu. Rev. Biochem.* **83**, 779–812 (2014). [doi:10.1146/annurev-biochem-060713-035802](https://doi.org/10.1146/annurev-biochem-060713-035802) [Medline](#)
15. H. P. Harding, I. Novoa, Y. Zhang, H. Zeng, R. Wek, M. Schapira, D. Ron, Regulated translation initiation controls stress-induced gene expression in mammalian cells. *Mol. Cell* **6**, 1099–1108 (2000). [doi:10.1016/S1097-2765\(00\)00108-8](https://doi.org/10.1016/S1097-2765(00)00108-8) [Medline](#)
16. K. M. Vattam, R. C. Wek, Reinitiation involving upstream ORFs regulates ATF4 mRNA translation in mammalian cells. *Proc. Natl. Acad. Sci. U.S.A.* **101**, 11269–11274 (2004). [doi:10.1073/pnas.0400541101](https://doi.org/10.1073/pnas.0400541101) [Medline](#)
17. H. P. Harding, Y. Zhang, H. Zeng, I. Novoa, P. D. Lu, M. Calton, N. Sadri, C. Yun, B. Popko, R. Paules, D. F. Stojdl, J. C. Bell, T. Hettmann, J. M. Leiden, D. Ron, An integrated stress response regulates amino acid metabolism and resistance to oxidative stress. *Mol. Cell* **11**, 619–633 (2003). [doi:10.1016/S1097-2765\(03\)00105-9](https://doi.org/10.1016/S1097-2765(03)00105-9) [Medline](#)
18. C. Sidrauski, D. Acosta-Alvear, A. Khoutorsky, P. Vedantham, B. R. Hearn, H. Li, K. Gamache, C. M. Gallagher, K. K.-H. Ang, C. Wilson, V. Okreglak, A. Ashkenazi, B. Hann, K. Nader, M. R. Arkin, A. R. Renslo, N. Sonenberg, P. Walter, Pharmacological brake-release of mRNA translation enhances cognitive memory. *eLife* **2**, e00498 (2013). [doi:10.7554/eLife.00498](https://doi.org/10.7554/eLife.00498) [Medline](#)
19. C. Sidrauski, A. M. McGeachy, N. T. Ingolia, P. Walter, The small molecule ISRIB reverses the effects of eIF2 $\alpha$  phosphorylation on translation and stress granule assembly. *eLife* **4**, (2015). [doi:10.7554/eLife.05033](https://doi.org/10.7554/eLife.05033)
20. G. V. Di Prisco, W. Huang, S. A. Buffington, C.-C. Hsu, P. E. Bonnen, A. N. Placzek, C. Sidrauski, K. Krnjević, R. J. Kaufman, P. Walter, M. Costa-Mattioli, Translational control of mGluR-dependent long-term depression and object-place learning by eIF2 $\alpha$ . *Nat. Neurosci.* **17**, 1073–1082 (2014). [doi:10.1038/nn.3754](https://doi.org/10.1038/nn.3754) [Medline](#)

21. H. P. Harding, D. Ron, in *Translational Control in Biology and Medicine*, M. B. Mathews, N. Sonenberg, J. W. B. Hershey, Eds. (Cold Spring Harbor Laboratory Press, 2007), pp. 345–368.
22. P. Remondelli, M. Renna, The endoplasmic reticulum unfolded protein response in neurodegenerative disorders and its potential therapeutic significance. *Front. Mol. Neurosci.* **10**, 187 (2017). [doi:10.3389/fnmol.2017.00187](https://doi.org/10.3389/fnmol.2017.00187) [Medline](#)
23. J. Obacz, T. Avril, P.-J. Le Reste, H. Urrea, V. Quillien, C. Hetz, E. Chevet, Endoplasmic reticulum proteostasis in glioblastoma—From molecular mechanisms to therapeutic perspectives. *Sci. Signal.* **10**, eaal2323 (2017). [doi:10.1126/scisignal.aal2323](https://doi.org/10.1126/scisignal.aal2323)
24. G. Martínez, C. Duran-Aniotz, F. Cabral-Miranda, J. P. Vivar, C. Hetz, Endoplasmic reticulum proteostasis impairment in aging. *Aging Cell* **16**, 615–623 (2017). [doi:10.1111/acel.12599](https://doi.org/10.1111/acel.12599) [Medline](#)
25. P. A. J. Leegwater, G. Vermeulen, A. A. M. Konst, S. Naidu, J. Mulders, A. Visser, P. Kersbergen, D. Mobach, D. Fonds, C. G. M. van Berkel, R. J. L. F. Lemmers, R. R. Frants, C. B. M. Oudejans, R. B. H. Schutgens, J. C. Pronk, M. S. van der Knaap, Subunits of the translation initiation factor eIF2B are mutant in leukoencephalopathy with vanishing white matter. *Nat. Genet.* **29**, 383–388 (2001). [doi:10.1038/ng764](https://doi.org/10.1038/ng764) [Medline](#)
26. M. Halliday, H. Radford, Y. Sekine, J. Moreno, N. Verity, J. le Quesne, C. A. Ortori, D. A. Barrett, C. Fromont, P. M. Fischer, H. P. Harding, D. Ron, G. R. Mallucci, Partial restoration of protein synthesis rates by the small molecule ISRIB prevents neurodegeneration without pancreatic toxicity. *Cell Death Dis.* **6**, e1672–e1679 (2015). [doi:10.1038/cddis.2015.49](https://doi.org/10.1038/cddis.2015.49) [Medline](#)
27. A. Chou, K. Krukowski, T. Jopson, P. J. Zhu, M. Costa-Mattioli, P. Walter, S. Rosi, Inhibition of the integrated stress response reverses cognitive deficits after traumatic brain injury. *Proc. Natl. Acad. Sci. U.S.A.* **114**, E6420–E6426 (2017). [doi:10.1073/pnas.1707661114](https://doi.org/10.1073/pnas.1707661114) [Medline](#)
28. C. Sidrauski, J. C. Tsai, M. Kampmann, B. R. Hearn, P. Vedantham, P. Jaishankar, M. Sokabe, A. S. Mendez, B. W. Newton, E. L. Tang, E. Verschueren, J. R. Johnson, N. J. Krogan, C. S. Fraser, J. S. Weissman, A. R. Renslo, P. Walter, Pharmacological dimerization and activation of the exchange factor eIF2B antagonizes the integrated stress response. *eLife* **4**, e07314 (2015). [doi:10.7554/eLife.07314](https://doi.org/10.7554/eLife.07314) [Medline](#)
29. Y. Sekine, A. Zyryanova, A. Crespillo-Casado, P. M. Fischer, H. P. Harding, D. Ron, Mutations in a translation initiation factor identify the target of a memory-enhancing compound. *Science* **348**, 1027–1030 (2015). [doi:10.1126/science.aaa6986](https://doi.org/10.1126/science.aaa6986) [Medline](#)
30. R. A. de Almeida, A. Fogli, M. Gaillard, G. C. Scheper, O. Boesflug-Tanguy, G. D. Pavitt, A yeast purification system for human translation initiation factors eIF2 and eIF2B $\epsilon$  and

- their use in the diagnosis of CACH/VWM disease. *PLOS ONE* **8**, e53958 (2013).  
[doi:10.1371/journal.pone.0053958](https://doi.org/10.1371/journal.pone.0053958) [Medline](#)
31. A. G. Rowlands, R. Panniers, E. C. Henshaw, The catalytic mechanism of guanine nucleotide exchange factor action and competitive inhibition by phosphorylated eukaryotic initiation factor 2. *J. Biol. Chem.* **263**, 5526–5533 (1988). [Medline](#)
  32. D. D. Williams, N. T. Price, A. J. Loughlin, C. G. Proud, Characterization of the mammalian initiation factor eIF2B complex as a GDP dissociation stimulator protein. *J. Biol. Chem.* **276**, 24697–24703 (2001). [doi:10.1074/jbc.M011788200](https://doi.org/10.1074/jbc.M011788200) [Medline](#)
  33. B. L. Craddock, C. G. Proud, The  $\alpha$ -subunit of the mammalian guanine nucleotide-exchange factor eIF-2B is essential for catalytic activity in vitro. *Biochem. Biophys. Res. Commun.* **220**, 843–847 (1996). [doi:10.1006/bbrc.1996.0495](https://doi.org/10.1006/bbrc.1996.0495) [Medline](#)
  34. B. R. Hearn, P. Jaishankar, C. Sidrauski, J. C. Tsai, P. Vedantham, S. D. Fontaine, P. Walter, A. R. Renslo, Structure-activity studies of Bis-O-arylglycolamides: Inhibitors of the integrated stress response. *ChemMedChem* **11**, 870–880 (2016).  
[doi:10.1002/cmdc.201500483](https://doi.org/10.1002/cmdc.201500483) [Medline](#)
  35. A. F. Zyryanova, F. Weis, A. Faille, A. Abo Alard, A. Crespillo-Casado, Y. Sekine, H. P. Harding, F. Allen, L. Parts, C. Fromont, P. M. Fischer, A. J. Warren, D. Ron, Binding of ISRIB reveals a regulatory site in the nucleotide exchange factor eIF2B. *Science* **359**, 1533 (2018).
  36. S. Q. Zheng, E. Palovcak, J.-P. Armache, K. A. Verba, Y. Cheng, D. A. Agard, MotionCor2: Anisotropic correction of beam-induced motion for improved cryo-electron microscopy. *Nat. Methods* **14**, 331–332 (2017). [doi:10.1038/nmeth.4193](https://doi.org/10.1038/nmeth.4193) [Medline](#)
  37. K. Zhang, Gctf: Real-time CTF determination and correction. *J. Struct. Biol.* **193**, 1–12 (2016). [doi:10.1016/j.jsb.2015.11.003](https://doi.org/10.1016/j.jsb.2015.11.003) [Medline](#)
  38. D. Kimanius, B. O. Forsberg, S. H. Scheres, E. Lindahl, Accelerated cryo-EM structure determination with parallelisation using GPUs in RELION-2. *eLife* **5**, e18722 (2016).  
[doi:10.7554/eLife.18722](https://doi.org/10.7554/eLife.18722) [Medline](#)
  39. A. Punjani, J. L. Rubinstein, D. J. Fleet, M. A. Brubaker, cryoSPARC: Algorithms for rapid unsupervised cryo-EM structure determination. *Nat. Methods* **14**, 290–296 (2017).  
[doi:10.1038/nmeth.4169](https://doi.org/10.1038/nmeth.4169) [Medline](#)
  40. N. Grigorieff, Frealign: An exploratory tool for single-particle cryo-EM. *Methods Enzymol.* **579**, 191–226 (2016). [doi:10.1016/bs.mie.2016.04.013](https://doi.org/10.1016/bs.mie.2016.04.013) [Medline](#)
  41. E. F. Pettersen, T. D. Goddard, C. C. Huang, G. S. Couch, D. M. Greenblatt, E. C. Meng, T. E. Ferrin, UCSF Chimera—a visualization system for exploratory research and analysis. *J. Comput. Chem.* **25**, 1605–1612 (2004). [doi:10.1002/jcc.20084](https://doi.org/10.1002/jcc.20084) [Medline](#)

42. L. A. Kelley, S. Mezulis, C. M. Yates, M. N. Wass, M. J. E. Sternberg, The Phyre2 web portal for protein modeling, prediction and analysis. *Nat. Protoc.* **10**, 845–858 (2015). [doi:10.1038/nprot.2015.053](https://doi.org/10.1038/nprot.2015.053) [Medline](#)
43. T. B. Hiyama, T. Ito, H. Imataka, S. Yokoyama, Crystal structure of the  $\alpha$  subunit of human translation initiation factor 2B. *J. Mol. Biol.* **392**, 937–951 (2009). [doi:10.1016/j.jmb.2009.07.054](https://doi.org/10.1016/j.jmb.2009.07.054) [Medline](#)
44. N. W. Moriarty, R. W. Grosse-Kunstleve, P. D. Adams, Electronic Ligand Builder and Optimization Workbench (eLBOW): A tool for ligand coordinate and restraint generation. *Acta Crystallogr. D* **65**, 1074–1080 (2009). [doi:10.1107/S0907444909029436](https://doi.org/10.1107/S0907444909029436) [Medline](#)
45. P. Emsley, B. Lohkamp, W. G. Scott, K. Cowtan, Features and development of Coot. *Acta Crystallogr. D* **66**, 486–501 (2010). [doi:10.1107/S0907444910007493](https://doi.org/10.1107/S0907444910007493) [Medline](#)
46. P. D. Adams, P. V. Afonine, G. Bunkóczi, V. B. Chen, I. W. Davis, N. Echols, J. J. Headd, L.-W. Hung, G. J. Kapral, R. W. Grosse-Kunstleve, A. J. McCoy, N. W. Moriarty, R. Oeffner, R. J. Read, D. C. Richardson, J. S. Richardson, T. C. Terwilliger, P. H. Zwart, PHENIX: A comprehensive Python-based system for macromolecular structure solution. *Acta Crystallogr. D* **66**, 213–221 (2010). [doi:10.1107/S0907444909052925](https://doi.org/10.1107/S0907444909052925) [Medline](#)
47. V. B. Chen, W. B. Arendall 3rd, J. J. Headd, D. A. Keedy, R. M. Immormino, G. J. Kapral, L. W. Murray, J. S. Richardson, D. C. Richardson, MolProbity: All-atom structure validation for macromolecular crystallography. *Acta Crystallogr. D* **66**, 12–21 (2010). [doi:10.1107/S0907444909042073](https://doi.org/10.1107/S0907444909042073) [Medline](#)
48. S. J. Ludtke, Single-particle refinement and variability analysis in EMAN2.1. *Methods Enzymol.* **579**, 159–189 (2016). [doi:10.1016/bs.mie.2016.05.001](https://doi.org/10.1016/bs.mie.2016.05.001) [Medline](#)
49. P. Schuck, Size-distribution analysis of macromolecules by sedimentation velocity ultracentrifugation and lamm equation modeling. *Biophys. J.* **78**, 1606–1619 (2000). [doi:10.1016/S0006-3495\(00\)76713-0](https://doi.org/10.1016/S0006-3495(00)76713-0) [Medline](#)
